# Supplementary material for: Boron-based ternary Rb6Be2B6 cluster featuring unique sandwich geometry and a naked hexagonal boron ring
Source: Royal Society of Chemistry journal article supplement (doi:10.1039/d0cp03123b), 2020-01-01
Supplement: d0cp03123b1.pdf [file d0cp03123b1.pdf]

## SUPPLEMENTARY INFORMATION

### Boron-Based Ternary $\text{Rb}_6\text{Be}_2\text{B}_6$ Cluster Featuring Unique Sandwich Geometry and Naked Hexagonal Boron Ring†

Ying-Jin Wang,<sup>\*ab</sup> Lin-Yan Feng,<sup>b</sup> Li Xu,<sup>a</sup> Xiang-Ru Hou,<sup>a</sup> Nan Li,<sup>a</sup>

Chang-Qing Miao,<sup>a</sup> and Hua-Jin Zhai<sup>\*b</sup>

<sup>a</sup>Department of Chemistry, Xinzhou Teachers University, Xinzhou 034000, Shanxi, China

<sup>b</sup>Nanocluster Laboratory, Institute of Molecular Science, Shanxi University, Taiyuan 030006, China

\*E-mail: yingjinwang@sxu.edu.cn; hj.zhai@sxu.edu.cn

### Supplementary Information – Part I

- Table S1.** Cartesian coordinates for selected optimized structures of  $\text{Rb}_6\text{Be}_2\text{B}_6$  cluster at the PBE0/def2-qzvp level: the  $D_{3d}$  ( $^1A_{1g}$ ) global-minimum (GM) *versus* the  $\text{TS}_1$  ( $D_{3d}$ ,  $^1A_{1g}$ ) and  $\text{TS}_2$  ( $D_{3h}$ ,  $^1A_1'$ ) transition states (TSs).
- Figure S1.** Alternative optimized low-lying structures of  $\text{Rb}_6\text{Be}_2\text{B}_6$  cluster. Relative energies are shown in square brackets at the PBE0/def2-qzvp level with corrections for zero-point energies (ZPEs). Also shown are the relative energies for top five isomers at the single-point CCSD(T)/def2-qzvp//PBE0/def2-qzvp level. All energies are in eV.
- Figure S2.** Two different  $\sigma$  bonding schemes for the  $\text{BeRb}_3$  ligands in GM  $D_{3d}$  ( $^1A_{1g}$ )  $\text{Rb}_6\text{Be}_2\text{B}_6$  cluster on the basis of adaptive natural density partitioning (AdNDP) analysis. Occupation numbers (ONs) are indicated. The three-center two-electron (3c-2e)  $\sigma$  scheme in (b) gives a relatively low ON value, indicating that the  $\sigma$

bond is entirely delocalized within the tetrahedral BeRb<sub>3</sub> unit as presented in the 4c-2e  $\sigma$  scheme in (a).

**Figure S3.** Comparison of the delocalized  $\pi/\sigma$  sextets of (a)  $D_{3d}$  ( $^1A_{1g}$ ) GM Rb<sub>6</sub>Be<sub>2</sub>B<sub>6</sub> cluster with those of (b) model  $D_{6h}$  C<sub>6</sub> cluster and (c) benzene.

**Figure S4.** Calculated bond distances in Å for (a) TS<sub>1</sub> ( $D_{3d}$ ,  $^1A_{1g}$ ) and (d) TS<sub>2</sub> ( $D_{3h}$ ,  $^1A_1'$ ) structures of Rb<sub>6</sub>Be<sub>2</sub>B<sub>6</sub> cluster, along with their (b/e) Wiberg bond indices (WBIs) and natural atomic charges (c/f; in |e|) from the natural bond orbital (NBO) analyses at the PBE0/def2-qzvp level.

**Figure S5.** Displacement vectors for the soft, imaginary vibrational modes of the TS<sub>1</sub> and TS<sub>2</sub> structures.

## Supplementary Information – Part II

**A short movie** extracted from the BOMD simulation for Rb<sub>6</sub>Be<sub>2</sub>B<sub>6</sub> cluster. The simulation was performed at 300 K for 20 ps. The movie roughly covers a time span of 6 ps.

**Figure S1.** Alternative optimized low-lying structures of  $\text{Rb}_6\text{Be}_2\text{B}_6$  cluster. Relative energies are shown in square brackets at the PBE0/def2-qzvp level with corrections for zero-point energies (ZPEs). Also shown are the relative energies for top five isomers at the single-point CCSD(T)/def2-qzvp//PBE0/def2-qzvp level. All energies are in eV.

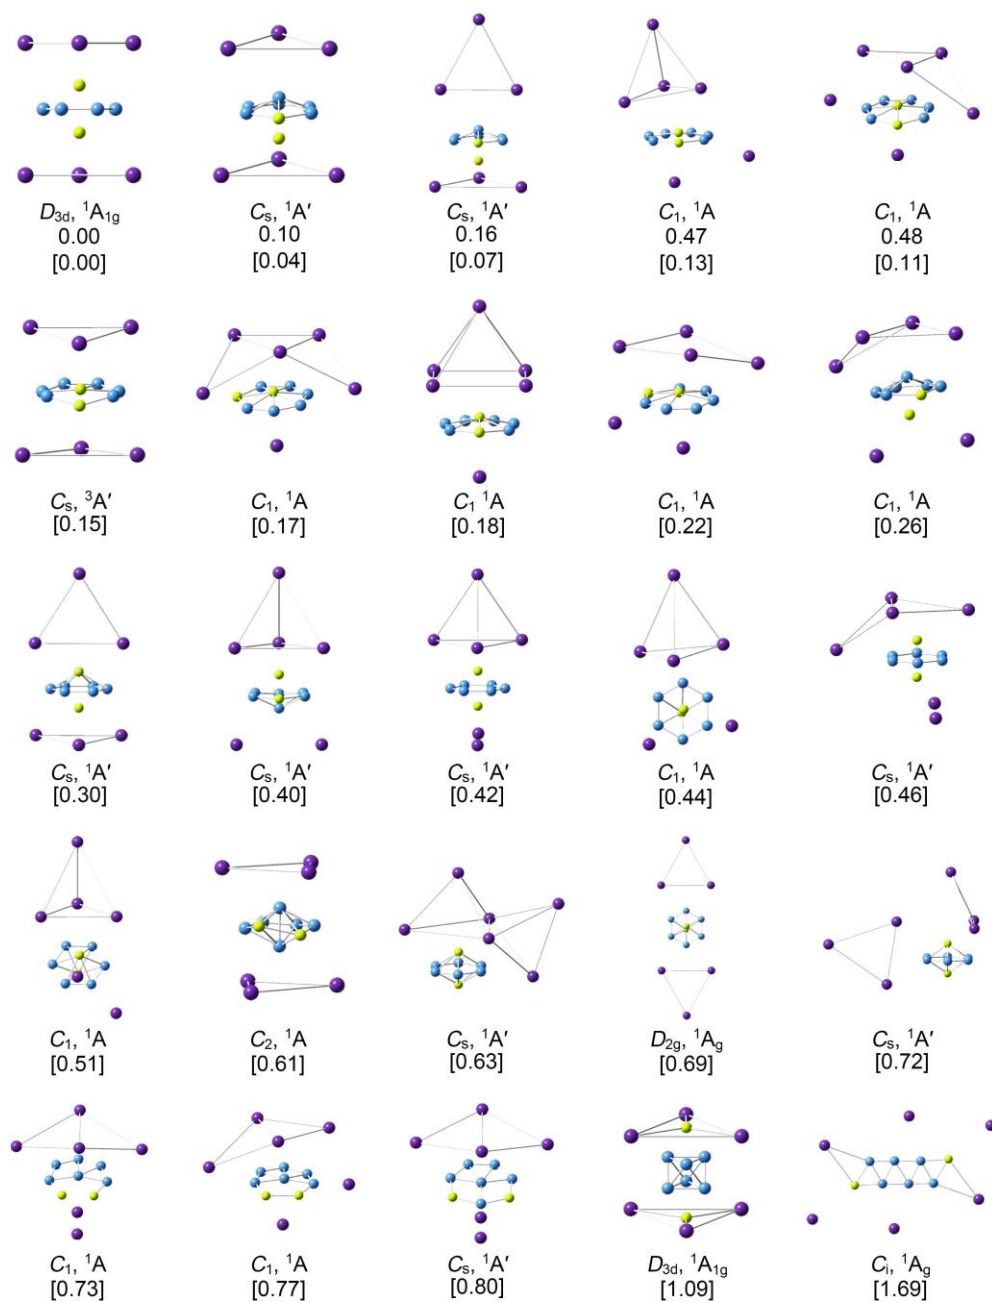

**Figure S2.** Two different  $\sigma$  bonding schemes for the  $\text{BeRb}_3$  ligands in GM  $D_{3d}$  ( $^1A_{1g}$ )  $\text{Rb}_6\text{Be}_2\text{B}_6$  cluster on the basis of adaptive natural density partitioning (AdNDP) analysis. Occupation numbers (ONs) are indicated. The three-center two-electron (3c-2e)  $\sigma$  scheme in (b) gives a relatively low ON value, indicating that the  $\sigma$  bond is entirely delocalized within the tetrahedral  $\text{BeRb}_3$  unit as presented in the 4c-2e  $\sigma$  scheme in (a).

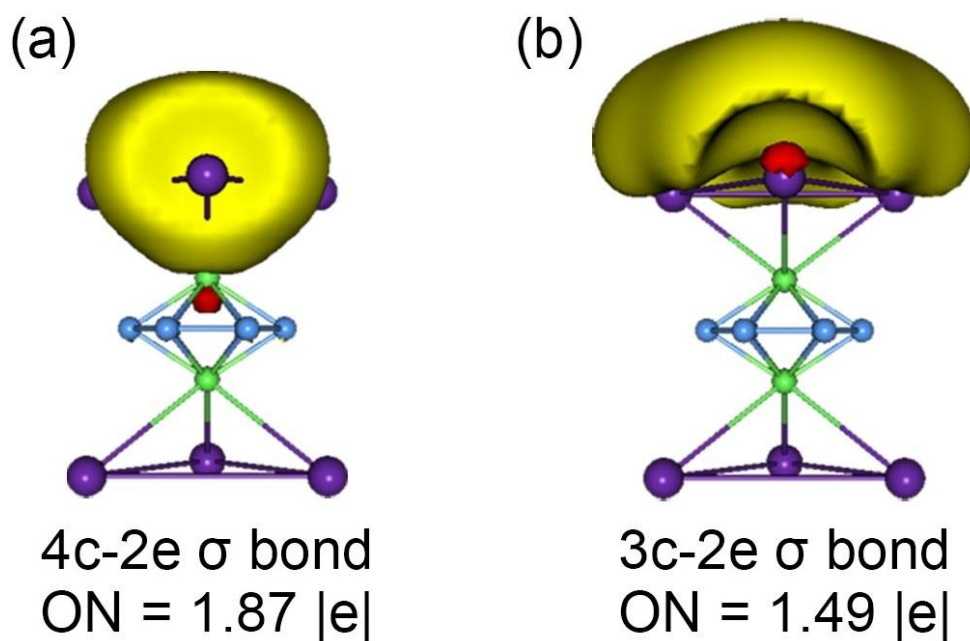

**Figure S3.** Comparison of the delocalized  $\pi/\sigma$  sextets of (a)  $D_{3d}$  ( $^1A_{1g}$ ) GM  $Rb_6Be_2B_6$  cluster with those of (b) model  $D_{6h}$   $C_6$  cluster and (c) benzene.

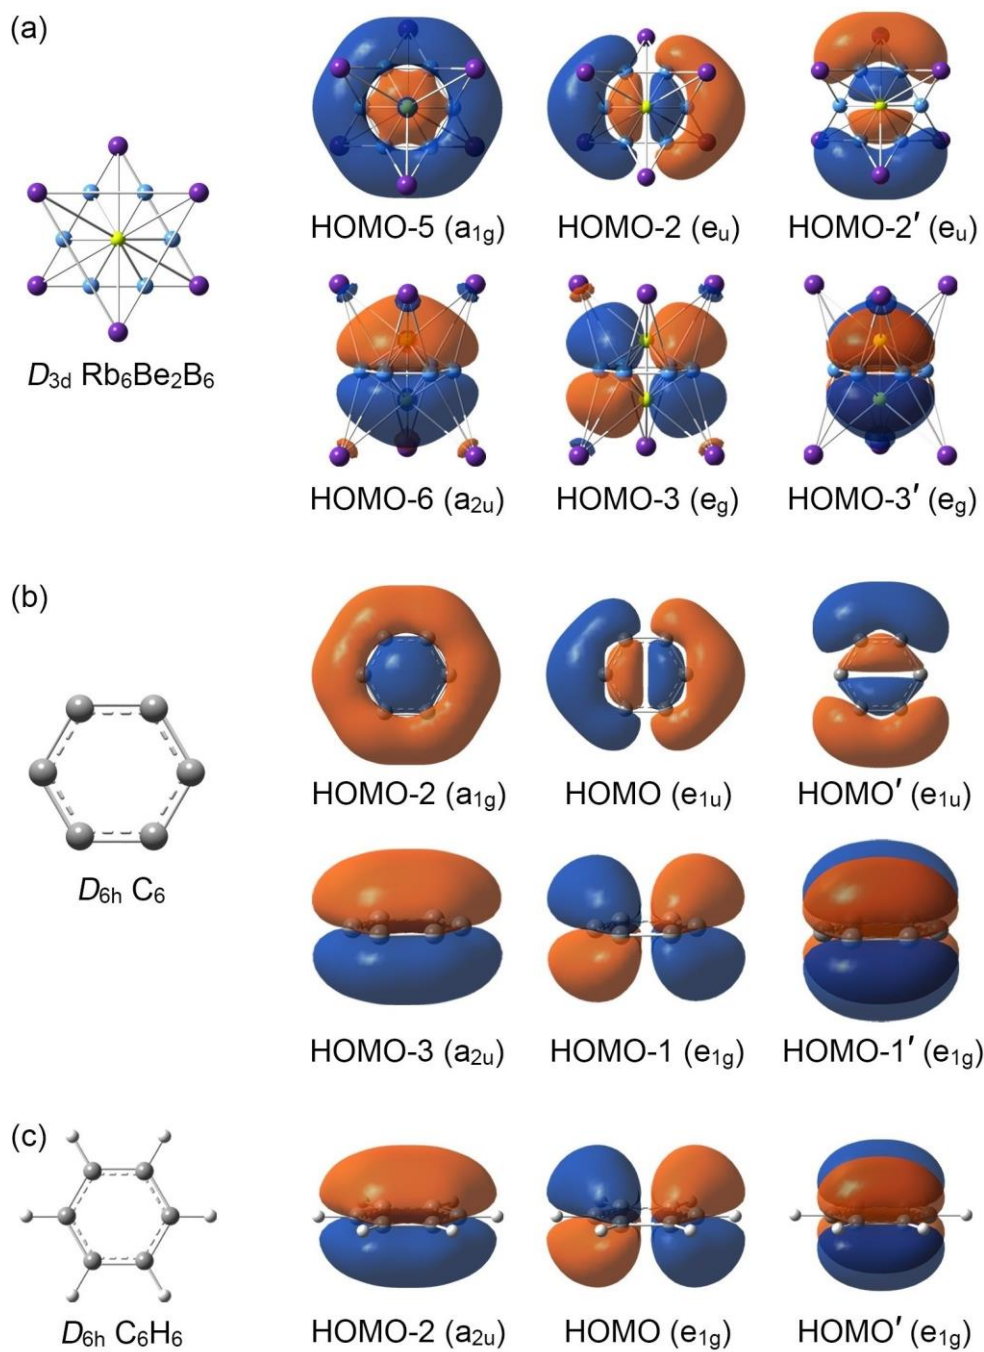

**Figure S4.** Calculated bond distances in Å for (a)  $TS_1 (D_{3d}, ^1A_{1g})$  and (d)  $TS_2 (D_{3h}, ^1A_1')$  structures of  $Rb_6Be_2B_6$  cluster, along with their (b/e) Wiberg bond indices (WBIs) and natural atomic charges (c/f; in |e|) from the natural bond orbital (NBO) analyses at the PBE0/def2-qzvp level.

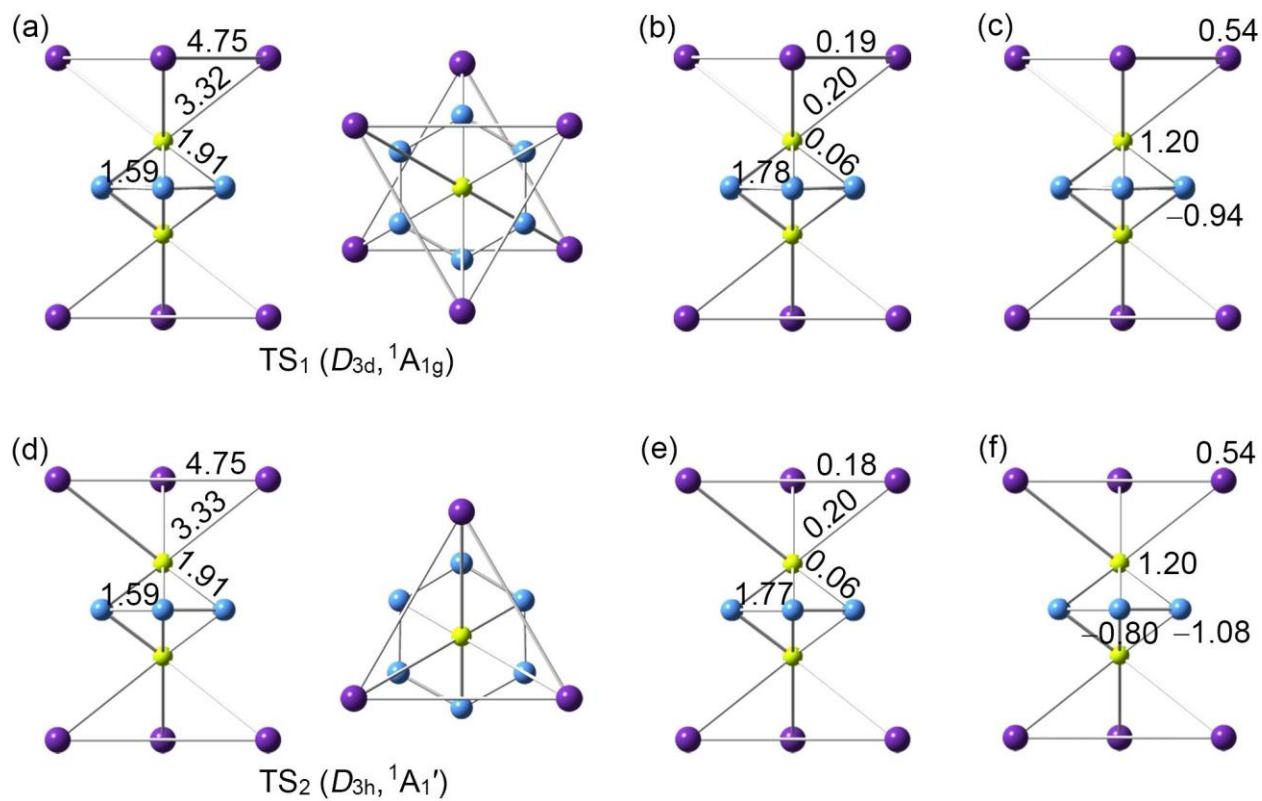

**Figure S5.** Displacement vectors for the soft, imaginary vibrational modes of the TS<sub>1</sub> and TS<sub>2</sub> structures.

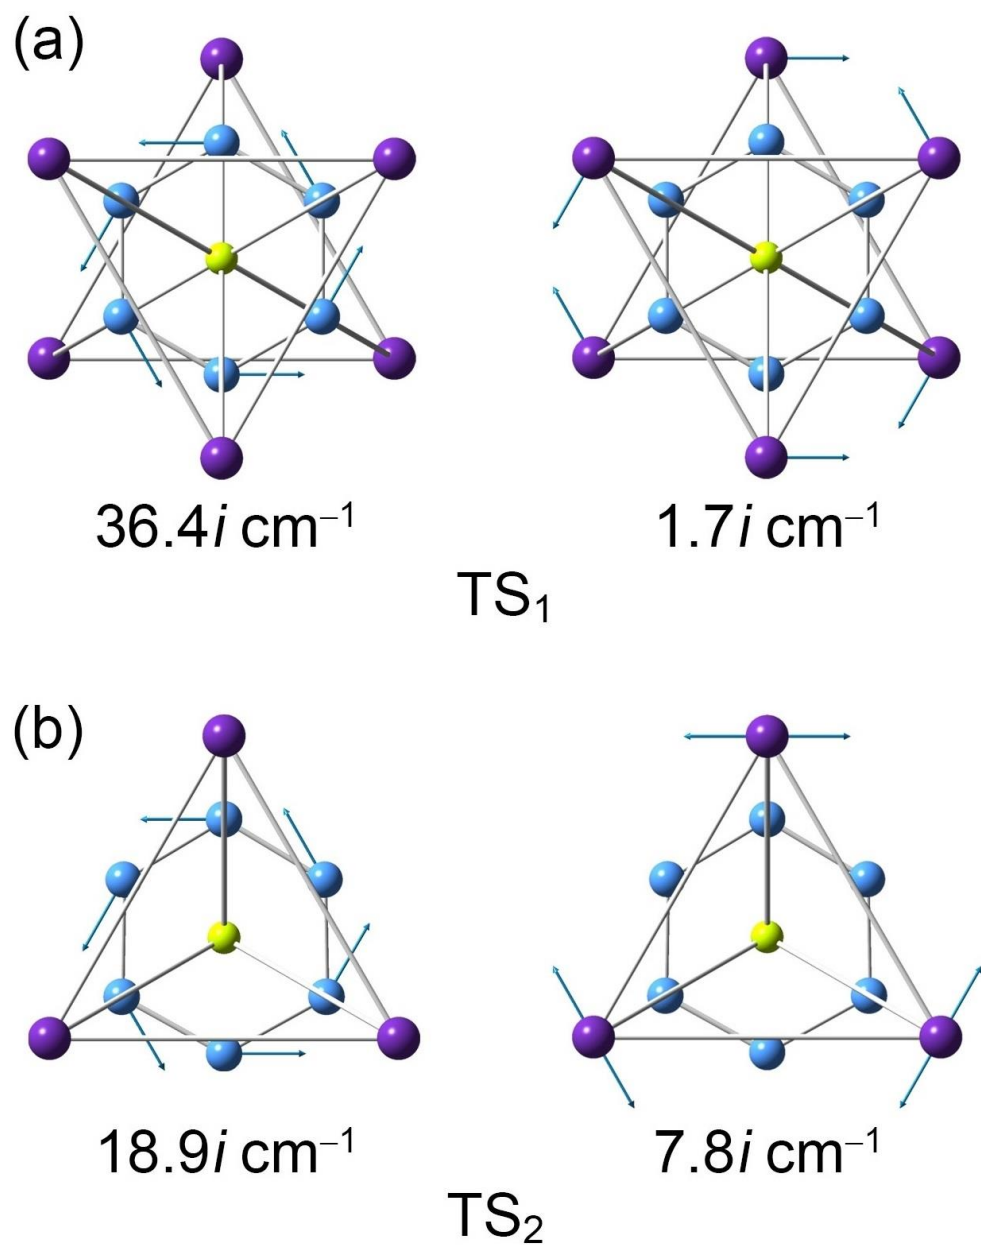

**Table S1.** Cartesian coordinates for selected optimized structures of  $\text{Rb}_6\text{Be}_2\text{B}_6$  cluster at the PBE0/def2-qzvp level: the  $D_{3d}$  ( $^1\text{A}_{1g}$ ) global-minimum (GM) *versus* the  $\text{TS}_1$  ( $D_{3d}$ ,  $^1\text{A}_{1g}$ ) and  $\text{TS}_2$  ( $D_{3h}$ ,  $^1\text{A}_1'$ ) transition states (TSs).

**$\text{Rb}_6\text{Be}_2\text{B}_6$  GM ( $D_{3d}$ ,  $^1\text{A}_{1g}$ )**

|    |             |             |             |
|----|-------------|-------------|-------------|
| B  | 0.79666800  | 1.37986900  | 0.00000000  |
| B  | -1.59333600 | 0.00000000  | 0.00000000  |
| B  | -0.79666800 | 1.37986900  | 0.00000000  |
| B  | 1.59333600  | 0.00000000  | 0.00000000  |
| B  | 0.79666800  | -1.37986900 | 0.00000000  |
| B  | -0.79666800 | -1.37986900 | 0.00000000  |
| Be | 0.00000000  | 0.00000000  | 1.04521700  |
| Be | 0.00000000  | 0.00000000  | -1.04521700 |
| Rb | -2.38064000 | -1.37446300 | -2.91883200 |
| Rb | 0.00000000  | 2.74892700  | -2.91883200 |
| Rb | 2.38064000  | -1.37446300 | -2.91883200 |
| Rb | 2.38064000  | 1.37446300  | 2.91883200  |
| Rb | 0.00000000  | -2.74892700 | 2.91883200  |
| Rb | -2.38064000 | 1.37446300  | 2.91883200  |

**$\text{Rb}_6\text{Be}_2\text{B}_6$   $\text{TS}_1$  ( $D_{3d}$ ,  $^1\text{A}_{1g}$ )**

|    |             |             |             |
|----|-------------|-------------|-------------|
| B  | 0.00000000  | 1.59235900  | 0.02400300  |
| B  | -1.37902400 | -0.79618000 | 0.02400300  |
| B  | -1.37902400 | 0.79618000  | -0.02400300 |
| B  | 1.37902400  | 0.79618000  | -0.02400300 |
| B  | 1.37902400  | -0.79618000 | 0.02400300  |
| B  | 0.00000000  | -1.59235900 | -0.02400300 |
| Be | 0.00000000  | 0.00000000  | 1.04432700  |



|    |             |             |             |
|----|-------------|-------------|-------------|
| Be | 0.00000000  | 0.00000000  | -1.04432700 |
| Rb | -2.37331000 | -1.37023100 | -2.91919500 |
| Rb | 0.00000000  | 2.74046200  | -2.91919500 |
| Rb | 2.37331000  | -1.37023100 | -2.91919500 |
| Rb | 2.37331000  | 1.37023100  | 2.91919500  |
| Rb | 0.00000000  | -2.74046200 | 2.91919500  |
| Rb | -2.37331000 | 1.37023100  | 2.91919500  |

**Rb<sub>6</sub>Be<sub>2</sub>B<sub>6</sub> TS<sub>2</sub> (*D*<sub>3h</sub>, <sup>1</sup>A<sub>1</sub>')**

|    |             |             |             |
|----|-------------|-------------|-------------|
| B  | 1.39248700  | 0.80395200  | 0.00000000  |
| B  | -1.39248700 | 0.80395200  | 0.00000000  |
| B  | 0.00000000  | 1.57697000  | 0.00000000  |
| B  | 1.36569600  | -0.78848500 | 0.00000000  |
| B  | 0.00000000  | -1.60790500 | 0.00000000  |
| B  | -1.36569600 | -0.78848500 | 0.00000000  |
| Be | 0.00000000  | 0.00000000  | 1.04792800  |
| Be | 0.00000000  | 0.00000000  | -1.04792800 |
| Rb | -2.37416000 | 1.37072200  | -2.93360200 |
| Rb | 2.37416000  | 1.37072200  | -2.93360200 |
| Rb | 0.00000000  | -2.74144400 | -2.93360200 |
| Rb | 2.37416000  | 1.37072200  | 2.93360200  |
| Rb | 0.00000000  | -2.74144400 | 2.93360200  |
| Rb | -2.37416000 | 1.37072200  | 2.93360200  |
